# Supplementary material
Source: Springer Nature journal article supplement (https://www.springermedizin.de/resource/supplementary/13045_2013_443_MOESM6_ESM.pdf/9661312)

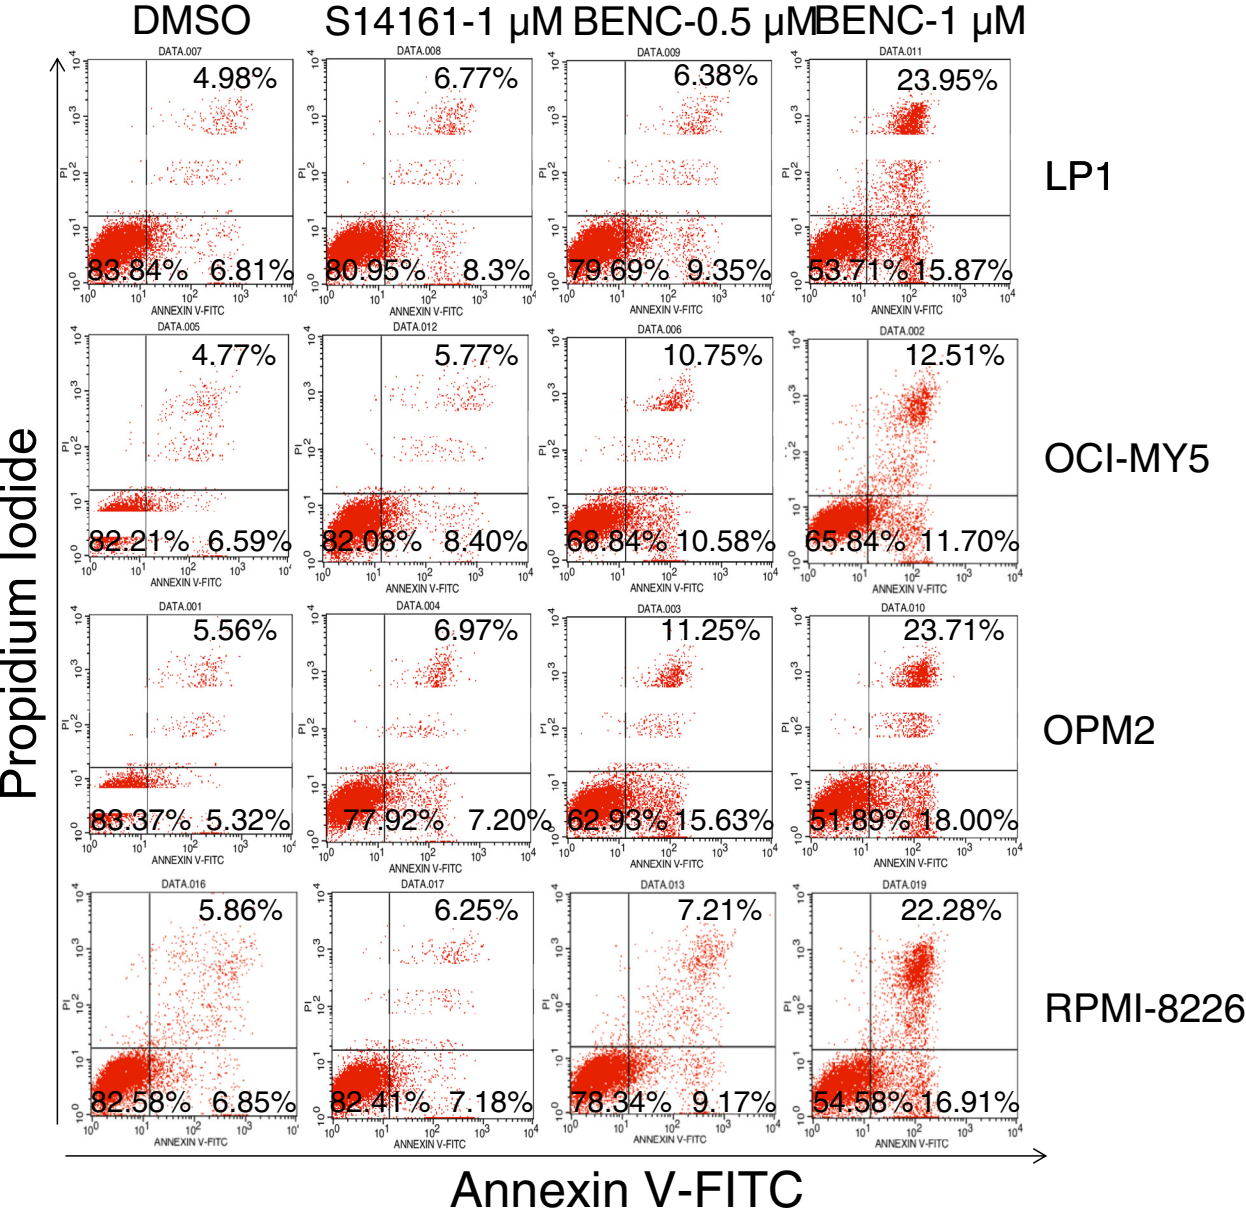

Supplement: MOESM6 [file 9661312]
